# Supplementary material for: Comparing rates and characteristics of emergency department presentations related to pharmaceutical opioid poisoning in Australia: a study protocol for a retrospective observational study
Source: PubMed Central journal article supplement — BMJ Open. 2020 Sep 29;10(9):e038979. doi: 10.1136/bmjopen-2020-038979 (PMC7526272; doi:10.1136/bmjopen-2020-038979), 2020-09-29
Supplement: bmjopen-2020-038979.draft_revisions.pdf [file bmjopen-2020-038979.draft_revisions.pdf]

# BMJ Open

BMJ Open is committed to open peer review. As part of this commitment we make the peer review history of every article we publish publicly available.

When an article is published we post the peer reviewers' comments and the authors' responses online. We also post the versions of the paper that were used during peer review. These are the versions that the peer review comments apply to.

The versions of the paper that follow are the versions that were submitted during the peer review process. They are not the versions of record or the final published versions. They should not be cited or distributed as the published version of this manuscript.

BMJ Open is an open access journal and the full, final, typeset and author-corrected version of record of the manuscript is available on our site with no access controls, subscription charges or pay-per-view fees (<http://bmjopen.bmj.com>).

If you have any questions on BMJ Open's open peer review process please email [info.bmjopen@bmj.com](mailto:info.bmjopen@bmj.com)

# BMJ Open

## Comparing rates and characteristics of emergency department presentations related to pharmaceutical opioid poisoning in Australia: a study protocol for a retrospective observational study

|                               |                                                                                                                                                                                                                                                                                                                                                                                                                                                                                                                                                                    |
|-------------------------------|--------------------------------------------------------------------------------------------------------------------------------------------------------------------------------------------------------------------------------------------------------------------------------------------------------------------------------------------------------------------------------------------------------------------------------------------------------------------------------------------------------------------------------------------------------------------|
| Journal:                      | <i>BMJ Open</i>                                                                                                                                                                                                                                                                                                                                                                                                                                                                                                                                                    |
| Manuscript ID                 | bmjopen-2020-038979                                                                                                                                                                                                                                                                                                                                                                                                                                                                                                                                                |
| Article Type:                 | Protocol                                                                                                                                                                                                                                                                                                                                                                                                                                                                                                                                                           |
| Date Submitted by the Author: | 31-Mar-2020                                                                                                                                                                                                                                                                                                                                                                                                                                                                                                                                                        |
| Complete List of Authors:     | Lam, Tina; Monash University Eastern Clinical Research Unit, Monash Addiction Research Centre<br>Hayman, Jane; Monash University, Victorian Injury Surveillance Unit; Monash University Accident Research Centre<br>Berecki-Gisolf, Janneke; Monash University, Monash Injury Research Institute<br>Sanfilippo, Paul; Monash University, Monash Addiction Research Institute<br>Lubman, D; Monash University, Eastern Health Clinical School<br>Nielsen, Suzanne; Monash University Eastern Clinical Research Unit, Monash Addiction Research Centre; UNSW Sydney, |
| Keywords:                     | Pain management < ANAESTHETICS, EPIDEMIOLOGY, PSYCHIATRY, Substance misuse < PSYCHIATRY, Suicide & self-harm < PSYCHIATRY, PUBLIC HEALTH                                                                                                                                                                                                                                                                                                                                                                                                                           |
|                               |                                                                                                                                                                                                                                                                                                                                                                                                                                                                                                                                                                    |

SCHOLARONE™  
Manuscripts

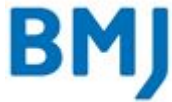

I, the Submitting Author has the right to grant and does grant on behalf of all authors of the Work (as defined in the below author licence), an exclusive licence and/or a non-exclusive licence for contributions from authors who are: i) UK Crown employees; ii) where BMJ has agreed a CC-BY licence shall apply, and/or iii) in accordance with the terms applicable for US Federal Government officers or employees acting as part of their official duties; on a worldwide, perpetual, irrevocable, royalty-free basis to BMJ Publishing Group Ltd ("BMJ") its licensees and where the relevant Journal is co-owned by BMJ to the co-owners of the Journal, to publish the Work in this journal and any other BMJ products and to exploit all rights, as set out in our [licence](#).

The Submitting Author accepts and understands that any supply made under these terms is made by BMJ to the Submitting Author unless you are acting as an employee on behalf of your employer or a postgraduate student of an affiliated institution which is paying any applicable article publishing charge ("APC") for Open Access articles. Where the Submitting Author wishes to make the Work available on an Open Access basis (and intends to pay the relevant APC), the terms of reuse of such Open Access shall be governed by a Creative Commons licence – details of these licences and which [Creative Commons](#) licence will apply to this Work are set out in our licence referred to above.

Other than as permitted in any relevant BMJ Author's Self Archiving Policies, I confirm this Work has not been accepted for publication elsewhere, is not being considered for publication elsewhere and does not duplicate material already published. I confirm all authors consent to publication of this Work and authorise the granting of this licence.

1  
2  
3 **Comparing rates and characteristics of emergency department**  
4 **presentations related to pharmaceutical opioid poisoning in**  
5 **Australia: a study protocol for a retrospective observational study**  
6  
7  
8  
9

10 Running title: Comparing ED poisoning presentations across pharmaceutical opioids  
11

12  
13 Tina Lam<sup>1</sup>, Jane Hayman<sup>2</sup>, Janneke Berecki-Gisolf<sup>2</sup>, Paul Sanfillippo<sup>1,3</sup>, Dan I Lubman<sup>1,3</sup>,  
14 Suzanne Nielsen<sup>1,3</sup>.  
15

- 16  
17  
18 1. Monash Addiction Research Centre, Eastern Health Clinical School, Monash University, Peninsula Campus,  
19 Moorooduc Hwy, Frankston, 3199, Victoria, Australia.  
20 2. Victorian Injury Surveillance Unit, Monash University Accident Research Centre, Monash University, 21 Alliance  
21 Ln, Clayton VIC 3800, Australia  
22 3. Turning Point, Eastern Health Clinical School, Monash University, 110 Church St, Richmond 3121, Victoria,  
23 Australia.  
24  
25

26 Corresponding author:

27 A/Professor Suzanne Nielsen

28 Level 3 Building G, 47-49 Moorooduc Highway, Frankston, VIC 3199 Australia

29 [suzanne.nielsen@monash.edu](mailto:suzanne.nielsen@monash.edu)  
30

31 +61 3 9904 4641  
32  
33  
34  
35

36 **Declarations of competing interests**  
37

38 In the past 5 years, SN has been an investigator on untied education grants from Indivior,  
39 unrelated to the current work. SN has provided training to health care professionals on  
40 identifying and treating codeine dependence for which her institution has received payment  
41 from Indivior. DL has received speaking honoraria from the following: Astra Zeneca,  
42 Indivior, Janssen-Cilag, Lundbeck, Servier and Shire, and has participated on Advisory  
43 Boards for Indivior and Lundbeck.  
44  
45  
46  
47  
48  
49

50 **Funding**  
51

52 The study is funded by an untied educational grant from Seqirus. SN is the recipient of an  
53 NHMRC Career Development Fellowship (#1163961). The funders will have no role in the  
54 study design, study conduct, analysis or data interpretation. Prior to publication, Seqirus will  
55 have the opportunity to review the manuscript and provide comment on factual inaccuracies,  
56 if identified.  
57  
58  
59  
60

## Abstract

### INTRODUCTION AND AIMS

Pharmaceutical opioids are an important contributor to the global ‘opioid crisis’, and are implicated in 70% of Australia’s opioid-related mortality. However, there have been few studies which consider the relative contribution of different pharmaceutical opioids to harm.

### METHOD AND ANALYSIS

Observational study of emergency department presentations for non-fatal poisoning related to pharmaceutical opioid use. Data from 2009-2019 will be extracted from the Victorian Emergency Minimum Dataset (VEMD) which contains data from public hospitals with dedicated emergency departments in Victoria, Australia’s second most populous state. A combination of free-text and ICD-10 codes will be used to identify relevant cases, with manual screening of each case to confirm relevance. We will calculate supply-adjusted rates of presentations using Poisson regression for all pharmaceutical opioid cases identified, separately for nine commonly prescribed pharmaceutical opioids (Buprenorphine, Codeine, Fentanyl, Methadone, Morphine, Oxycodone, Oxycodone-naloxone, Tapentadol, Tramadol), and for a multiple opioid category. We will use multinomial logistic regression to compare demographic and clinical characteristics, such as triage category, across opioid types.

### ETHICS AND DISSEMINATION

This work is conducted under approval 21427 from the Monash University Human Research Ethics Committee for ongoing injury surveillance. As per conditions of approval, cells of <5 will not be reported, though zeroes will be preserved. We will present project findings in a peer-reviewed journal article as well as at relevant scientific conferences.

### TRIAL REGISTRATION NUMBER

osf.io/t7mju

### KEYWORDS

Pharmaceutical opioids; Emergency Department; Overdose; Oxycodone; Tapentadol.

### WORD COUNT

2916 (excluding Tables)

## ARTICLE SUMMARY

### Strengths and Limitations

#### *Strengths*

- Indicator of population level opioid harm
- Cases have been selected using ICD-codes and free text searches, increasing the capture of relevant cases over studies that use ICD codes alone
- Manual confirmation of individual case eligibility, as opposed to assuming eligibility via ICD-code or keyword alone
- Inclusion of 9 different types of pharmaceutical opioids

#### *Limitations*

- Around two thirds of opioid-related cases have a specific opioid recorded, enabling inclusion in our analysis. One third do not. This means that the rates of poisoning are almost certainly an underestimation, though we have no reason to believe that this would create a bias in comparisons between individual opioids.

## Introduction

Over the past two decades, opioid-related deaths have rapidly escalated in high income regions, and despite a range of preventative strategies being trialled, the situation continues to worsen (1). Every day in Australia, there are almost 150 hospitalisations for opioid harms (2), and there was a 30% increase in US Emergency Department (ED) visits for opioid overdoses from 2016-2017 (3). Given substantial harms (e.g. 70% of opioid-related mortality in Australia) are attributed to pharmaceutical opioids (4), this has highlighted how important it is to understand the risk profiles associated with individual opioids.

Recent US research has revealed the risk profile of some pharmaceutical opioids may vary by potency (5). Similar research using Australian ambulance attendance data found that different pharmaceutical opioids have distinct patterns of harm (6). For example, the highest rates of opioid-related ambulance attendance were accounted for by the lowest potency opioid, different opioids were associated with accidental overdoses versus suicidal intent, and the availability and formulation of the opioid appeared important in explaining patterns of harm (6).

There is a need for further research to extend these findings with other datasets, and particularly to focus on the outcome of opioid poisoning (often referred to as 'overdose'). Non-fatal overdose is associated with increased risk of later fatal overdose, and is estimated to occur 13-30 times more frequently than fatal overdose (7, 8).

ED data is routinely used to monitor for trends in opioid poisoning (3). Although some studies have disaggregated by heroin and pharmaceutical opioids (9), few ED studies have differentiated between the individual pharmaceutical opioids involved. Relative harms with pharmaceutical opioids have been examined through coded ambulance attendances (6), however there are many patients who self-present to the ED without the use of an ambulance service, and these patients may represent a unique population.

This paper outlines a study to better understand pharmaceutical opioid poisonings treated within EDs to inform clinical treatment and prevention strategies.

We write this protocol to maximize transparency (10, 11) as the study is supported by an untied educational grant from Seqirus, who are the Australian distributors of Palexia® (tapentadol) and Tramal® (tramadol). Tapentadol was introduced to the Australian market in 2011, subsidised in 2013, and is currently the fourth most commonly prescribed opioid in Victoria (6).

## Methods

### *Study aims*

The proposed study has two key objectives:

- (1) To compare the supply-adjusted rates between 2009 and 2019 for Victorian ED opioid poisoning presentations across nine common pharmaceutical opioids and one 'multiple opioid' category
- (2) To examine demographics and other presentation characteristics including severity and context for opioid poisoning presentations with different pharmaceutical opioids

We will answer the following research questions:

1. Do the supply-adjusted rates of ED presentations differ over time and across pharmaceutical opioids?
2. Does the severity of presentation (as measured by triage category) or other characteristics vary by opioid type?

### *Study Design*

The study design is a retrospective observational study that uses administrative emergency department data in the VEMD, the Victorian Emergency Minimum Dataset. Existing pharmaceutical opioid-poisoning related emergency department presentations are identified, coded, and supply-adjusted rates are calculated to compare harms across opioids commonly prescribed within Australia including fentanyl, buprenorphine, oxycodone, oxycodone-naloxone, codeine, morphine, methadone, tramadol and tapentadol.

### *Study population*

Data come from public ED presentations in Victoria, Australia's second most populous jurisdiction, representing 26% of the Australian population (12). Victoria's per capita rate for unintentional pharmaceutical-opioid induced deaths is comparable with other Australian



1  
2  
3 jurisdictions (13), and previous work demonstrated that Victorian rates of ambulance  
4 attendance for extramedical pharmaceutical opioid use were broadly consistent with other  
5 jurisdictions (6). Australia has the eighth highest per capita licit pharmaceutical opioid  
6 consumption in the world (2).  
7  
8  
9

10  
11 This population-wide study has a catchment area of the entire Victorian state, for the past 10  
12 years (July 2009 – June 2019), for individuals aged 12 years of age and older. Data will be  
13 obtained from all 38 public hospitals with a 24 hour ED contributing to the VEMD (the  
14 Victorian Emergency Minimum Dataset).  
15  
16  
17  
18

### 19 20 *ED data*

21 Emergency Department (ED) presentations are an important population level indicator of  
22 opioid-related harm. The VEMD (14) captures presentations related to drug poisoning and  
23 overdose.  
24  
25  
26  
27

28 Using approaches consistent with previous work with ambulance datasets (15), these ED data  
29 provide a useful way to identify if harms are emerging with specific pharmaceutical drugs,  
30 and to understand the nature of these harms. These data can inform both the relative  
31 frequency and severity of presentations associated with different pharmaceutical opioids.  
32 These findings will complement previous work (15), and when these reports are considered  
33 together, will advance our knowledge on the prevalence and severity of opioid-related harms  
34 involving different pharmaceutical opioids.  
35  
36  
37  
38  
39  
40

### 41 42 *Opioids of interest*

43 We will extract all VEMD records pertaining to pharmaceutical opioid poisoning, and  
44 concentrate our analyses on the subset of data where the specific pharmaceutical opioid(s)  
45 involved in the presentation is documented.  
46  
47  
48  
49

50 We will analyse the data by nine specific opioids, with a tenth category for presentations  
51 involving multiple-opioids. Based on previous research with ambulance attendances we  
52 expect records involving multiple pharmaceutical opioids will represent less than 10% of  
53 cases (6). Given the small expected numbers, the inclusion of the 'multiple opioids' group is  
54 not expected to affect conclusions drawn from the study. We will quantify the individual  
55  
56  
57  
58  
59  
60

1  
2  
3 opioids within the multiple opioid category, but not attempt to attribute outcomes to  
4 individual opioids within the multiple opioid category.  
5  
6  
7

8 The opioid categories we will analyse are: (i) Buprenorphine, (ii) Codeine (iii) Fentanyl, (iv)  
9 Methadone, (v) Morphine, (vi) Oxycodone, (vii) Oxycodone-naloxone, (viii) Tapentadol, (ix)  
10 Tramadol, (x) Multiple opioids.  
11  
12  
13

### 14 *Case identification and coding*

15 Records of opioid-poisoning cases from July 2009 to June 2019 will be extracted from the  
16 VEMD by the Victorian Injury Surveillance Unit (VISU) at Monash University in April/May  
17 2020 following external protocol peer review.  
18  
19  
20  
21

22 Inclusion of a case is based on the documentation that the opioid was involved in the ED  
23 presentation, and this is established based on the 1) narrative data recorded in the VEMD,  
24 and/or 2) and International Classification of Diseases 10th Revision, Australian modification  
25 (ICD10-AM) poisoning diagnosis codes T40.2, T40.3, T40.4 (see Table 1 for an overview).  
26  
27  
28  
29

### 30 **Selection of narrative cases**

31 A text search will be conducted of the 'Description of Event' variable, which contains a text  
32 narrative describing the opioid type and circumstances of the injury (presence of overdose or  
33 poisoning). The first part of the text search will be for drug names and brand names, and  
34 cases will be coded into individual opioid types (e.g. codeine, methadone). Next, individual  
35 opioid types will be further coded as a poisoning or overdose if a) the following terms are  
36 listed in the 'Description of Event' text variable: 'overdose' 'od' 'o/d' 'poisoning' 'drug  
37 abuse' 'toxicity' 'poison' 'self harm' 'suicide' OR b) there is an ICD10-AM T40 'poisoning  
38 by narcotics and psychodysleptics' code anywhere within the three VEMD diagnosis codes.  
39  
40  
41  
42  
43  
44  
45  
46  
47

### 48 **Selection of ICD10-AM coded cases**

49 Where the 'Description of Injury Event' variable does not contain a drug name (i.e. not  
50 selected via the narrative search described above), cases of pharmaceutical opioid poisoning  
51 will be detected using relevant ICD10-AM codes. The VEMD injury data is coded according  
52 to the National Minimum Data Standards for Injury Surveillance with diagnoses coded  
53 according to the ICD-10-AM (14). As most of these cases do not contain opioid-specific  
54  
55  
56  
57  
58  
59  
60

1  
2  
3 information it is anticipated they will be included in the “all pharmaceutical opioid”  
4 overdoses category, but not included in the opioid-specific analyses.  
5  
6  
7

8 The following ICD10-AM T40 ‘poisoning by narcotics and psychodysleptics’ codes will be  
9 searched for anywhere within the three VEMD diagnosis codes:  
10

- 11 ○ T40.2 - Other opioids e.g. codeine or morphine, also hydromorphone,  
12 oxycodone, opioid Not Elsewhere Classified (NEC), hydrocodone
- 13 ○ T40.3 – Methadone
- 14 ○ T40.4 - Other synthetic narcotics, including pethidine, Opiate NEC,  
15 buprenorphine, dextropropoxyphene, fentanyl, tramadol  
16  
17  
18  
19

20  
21 Cases will be selected for all intent groups (unintentional, intentional self-harm, assault,  
22 maltreatment & neglect, other & undertermined intent). Cases will be restricted to those aged  
23 12 years and over to omit cases of accidental poisoning by children (16, 17).  
24  
25  
26

27  
28 An experienced data analyst will manually check all cases to ensure there are no  
29 inconsistencies between coded cases and the narrative (i.e. excluding cases where only non-  
30 opioid drugs are stated in the narrative) to confirm the ED presentation relates to a  
31 pharmaceutical opioid overdose or poisoning.  
32  
33  
34  
35

### 36 *Pharmaceutical opioid sales data*

37  
38 The utilisation of individual opioids will be estimated through the sale of each opioid to  
39 Victorian community pharmacies. This sales data (unit sales by strength of product for each  
40 of the opioids involved) will be accessed via a third party access agreement with the health  
41 information company IQVIA (iqvia.com). Sales data will represent the entire Victorian  
42 population (i.e. population level data) and do not contain individual identifiers.  
43  
44  
45  
46

47  
48 The total amount of each opioid supplied per month will be calculated in milligrams, and  
49 converted into Oral Morphine Equivalents (OME) so the analgesic effect of different opioids  
50 can be represented on the same scale (18). We will then use these OME to calculate a supply-  
51 adjusted rate of ED presentations, a method consistent with previous studies of  
52 pharmaceutical opioid related harm (4, 5).  
53  
54  
55  
56  
57  
58  
59  
60

### *Statistical Analysis*

Descriptive statistics will be used to summarise prescription opioid-related ED presentations (e.g. annual supply-adjusted rates for each opioid in Victoria, for each year in the study period). Units will be presentations per 100 000mg OME (18). Confidence intervals for rates will be calculated using the exact method based on the Poisson distribution. Statistics based on numbers less than five will not be reported, however, zeroes are preserved. Data may be aggregated (e.g. reported quarterly rather than by month) to ensure cell sizes of at least five.

#### *Aim 1 analysis plan – supply-adjusted rates of harm*

Poisson regression will be used to generate Incident Rate Ratios with 95% CIs for overall supply adjusted rates, allowing for simultaneous estimation of individual opioid effect sizes and their change over time. This will permit statistical comparisons of differences in supply-adjusted rates across different opioids. Averaged monthly rates of presentations by year examined for each pharmaceutical opioid will be reported. Rates of presentations will be calculated based on either monthly or three-month intervals (or longer time intervals if required, to enable minimum cell sizes of five), adjusted for supply of that opioid using Victorian pharmaceutical sales data. Where cell sizes are <5, to preserve anonymity, we will report the average of all cells with 1-4 cases, rather than the actual number of cases in that cell.

#### *Aim 2 analysis plan – characteristics of ED presentations*

We will compare presentation characteristics associated with different opioids using multinomial regression analysis. We will aggregate VEMD categories (14) to ensure that all analyses report cell sizes of at least five for variables such as patient demographics, context of presentation, admission outcome, and triage severity of presentation (Table 2). Year will be included as an independent variable to assess whether demographics and clinical characteristics changed over time.

All quantitative analyses will be conducted in SAS or Stata, with p values less than 0.05 considered significant.

#### *Handling known or expected missing data*

To minimise missing data to enable us to preserve reportable cells for aim 1 (i.e. no cell less than 5) we will aggregate the data into multiple month blocks (e.g. 3-monthly periods) as we

1  
2  
3 anticipate some opioids will have low counts in individual months and these data would not  
4 be able to be reported.  
5  
6  
7

8 In calculating rates of presentations, if the numerator is less than 10 for the analysis period,  
9 we will aggregate the available data over multiple periods, for example, to provide an  
10 estimate of the rate for the past year rather than a 3-month block, using standard procedures  
11 developed by the data custodians to ensure confidentiality with reported data.  
12  
13  
14  
15

16 Deaths in hospital would be recorded in the VEMD. It is of note however, that these are very  
17 rare. Deaths on arrival at ED are even rarer – five or less have been recorded for all causes in  
18 the VEMD database in the past 10 years. As such, we will not include deaths in our primary  
19 analyses due to limitations on reporting small cell sizes.  
20  
21  
22  
23  
24

### 25 *Ethics*

26 Ethics approval was obtained from the Monash University Human Research Ethics  
27 Committee for VISU to analyse VEMD data for injury surveillance purposes (21427).  
28 This approval requires strict conditions for the storage, retention and use of the VEMD data  
29 to protect privacy and confidentiality and all unit level data is stored and analysed onsite at  
30 VISU. Due to the sensitivity and potentially identifiable nature of the data line item data  
31 cannot be provided to researchers outside the VISU without additional ethical approval. As  
32 per standard procedures with the data custodians, cells of <5 will not be reported, though  
33 zeroes will be preserved. The sales data is held by IQVIA and ethics approval is not required  
34 for the use and publication of sales data.  
35  
36  
37  
38  
39  
40  
41  
42  
43  
44

### 45 *Data statement*

46 Researchers interested in using these data may approach VISU and IQVIA. Access fees for  
47 data and/or analyses may apply.  
48  
49  
50

### 51 *Dissemination*

52 We will present project findings in a peer-reviewed journal article as well as at relevant  
53 scientific conferences. Findings will be reported in accordance with the REporting of studies  
54 Conducted using Observational Routinely-collected health Data (RECORD) statement, an  
55 extension of the STROBE statement for reporting items specific to observational studies  
56 using routinely collected health data (19).  
57  
58  
59  
60

### *Patient and public Involvement*

Patients and the public were not involved in the design of the study.

## Discussion

This study aims to compare rates and characteristics of harm related to specific pharmaceutical opioids. Emergency Department presentations for opioid poisoning will be compared across nine of the most commonly used pharmaceutical opioids in Australia.

### *Strengths*

These findings will provide a detailed understanding of the relative contribution of well-established and newer pharmaceutical opioids to poisonings in Victoria, which to date have only been examined as a category of 'pharmaceutical opioids', or by the three ICD-10 categories Methadone, 'Other opioids' (e.g. codeine or morphine, oxycodone) and other synthetic narcotics (e.g. tramadol, fentanyl). These coding typically do not enable disaggregation of opioids with very different profiles (such as tramadol and fentanyl) nor have they been able to examine newer opioids with limited postmarketing surveillance such as tapentadol, which have seen large increases in prescribing in recent years (6, 20).

Emergency department presentations are used to provide a robust (but conservative) overview of opioid poisoning in Victoria. The dataset represents the population of Victoria (as represented by the hospitals that contribute to the VEMD) and will give the most complete picture of types of pharmaceutical opioid poisoning in ED settings in Victoria to date.

ED data is a population level measure that reflects real world harms with a broader capture than abuse liability studies, clinical trials, or spontaneous adverse event reporting systems. Opioid poisoning is a key measure of opioid-related harm that is driving policy change in Australia. These data are carefully hand coded and can inform both the relative frequency and severity of presentations associated with different pharmaceutical opioids. Importantly, this study will extract data using free-text searches as well as ICD-codes, the latter of which has been determined to substantially underestimate drug related harms in Victorian EDs (9, 21).

1  
2  
3 Furthermore, every case will be manually checked to confirm it represents a pharmaceutical  
4 opioid poisoning.  
5  
6  
7

8 Sales data is more inclusive than prescription data as it includes private prescription items  
9 and items that can be sold over the counter. Up to a fifth of opioids are not accounted for by  
10 government subsidised prescriptions (22), and this disproportionately affects some opioids  
11 such as codeine and tapentadol. So, the use of sales data will more closely approximate  
12 supply and actual use compared with the use of prescription subsidy data.  
13  
14  
15

16 This study will complement other research conducted comparing harms across  
17 pharmaceutical opioids. We will specifically examine ED opioid poisoning in this study,  
18 while previous research has examined a range of ambulance-attended opioid-related harms  
19 (6). Both supply-adjusted rates of harm will be available for triangulation for a similar time  
20 period within the state of Victoria providing a more comprehensive understanding of harms.  
21  
22  
23  
24  
25  
26  
27

### 28 *Limitations*

29 Reliable details on the source of opioid or nature of use are not routinely recorded in the  
30 VEMD, so details such as whether harms are related to nonmedical use versus therapeutic use  
31 will not be able to be explored. Similarly, the source of the drug is not typically recorded by  
32 the ED clinician as it is not a required clinical field in the database. As these are not  
33 consistently coded or reliable variables we do not intend to use them in this analysis. As such,  
34 these findings will primarily provide information on rates and characteristics of opioid  
35 poisoning presentations rather than the context of use.  
36  
37  
38  
39  
40  
41  
42  
43

44 The rates calculated using VEMD data are expected to underrepresent total pharmaceutical  
45 opioid-poisonings. Firstly, around one third of ED opioid cases do not have a specific opioid  
46 documented (23) - for example due to lack of detailed ICD10-AM codes for each drug type,  
47 or as the coder is unable to ascertain the type of opioid involved. This may lead to an  
48 underestimation of the rates of harm for each opioid, though we do not expect this to  
49 introduce bias to specific opioids. Secondly, the data will not capture overdoses managed  
50 outside the ED e.g. by paramedics and patient was not transferred on to the ED, noting that  
51 these are captured elsewhere (6), or not captured by a medical professional.  
52  
53  
54  
55  
56  
57  
58  
59  
60

1  
2  
3 Finally, there may be unmeasured confounders such as the likelihood of an individual being  
4 prescribed a specific opioid that we cannot account for using a naturalistic study design. It is  
5 of note however, patients who use opioids extramedically are usually excluded from the trials  
6 which are able to randomise potential confounders.  
7  
8  
9

10  
11 While the analysis will underrepresent total opioid-related harm in the general population, it  
12 will give the most complete picture of pharmaceutical opioid poisoning in ED settings.  
13  
14  
15

### 16 *Author contributions*

17  
18 Suzanne Nielsen (SN) initially conceptualised the study and drafted the initial design with  
19 input from Tina Lam (TL), Janneke Berecki-Gisolf (JB), and Jane Hayman (JH). Paul  
20 Sanfilippo (PS) provided input on the statistical analysis plan and contributed to the study  
21 design and manuscript. SN, TL, and Dan Lubman (DL) contributed to the drafting of the  
22 protocol manuscript, refining the design, and revisions of the protocol.  
23  
24  
25  
26  
27  
28  
29  
30  
31  
32  
33  
34  
35  
36  
37  
38  
39  
40  
41  
42  
43  
44  
45  
46  
47  
48  
49  
50  
51  
52  
53  
54  
55  
56  
57  
58  
59  
60



## References

1. Seth P, Scholl L, Rudd RA, Bacon S. Overdose Deaths Involving Opioids, Cocaine, and Psychostimulants - United States, 2015-2016. *MMWR Morbidity and mortality weekly report*. 2018;67(12):349-58.
2. Australian Institute for Health and Welfare. Opioid harm in Australia and comparisons between Australia and Canada. 2018.
3. Vivolo-Kantor AM, Seth P, Gladden RM, Mattson CL, Baldwin GT, Kite-Powell A, et al. Vital Signs: Trends in Emergency Department Visits for Suspected Opioid Overdoses — United States, July 2016–September 2017. *US Department of Health and Human Services/Centers for Disease Control and Prevention*; 2018 March 9 2018. Contract No.: US Department of Health and Human Services/Centers for Disease Control and Prevention 9, 2018 / Vol. 67 / No. 9.
4. Roxburgh A, Hall WD, Dobbins T, Gisev N, Burns L, Pearson S, et al. Trends in heroin and pharmaceutical opioid overdose deaths in Australia. *Drug & Alcohol Dependence*. 2017;179:192-8.
5. Murphy DL, Lebin JA, Severtson SG, Olsen HA, Dasgupta N, Dart RC. Comparative Rates of Mortality and Serious Adverse Effects Among Commonly Prescribed Opioid Analgesics. *Drug Saf*. 2018;41(8):787-95.
6. Nielsen S, Crossin R, Middleton M, Lam T, Wilson J, Scott D, et al. Comparing rates and characteristics of ambulance attendances related to extramedical use of pharmaceutical opioids in Victoria, Australia from 2013-2018. *Addiction*. 2020.
7. Caudarella A, Dong H, Milloy MJ, Kerr T, Wood E, Hayashi K. Non-fatal overdose as a risk factor for subsequent fatal overdose among people who inject drugs. *Drug Alcohol Depend*. 2016;162:51-5.
8. Stooze MA, Dietze PM, Jolley D. Overdose deaths following previous non-fatal heroin overdose: record linkage of ambulance attendance and death registry data. *Drug Alcohol Rev*. 2009;28(4):347-52.
9. Lam T, Kuhn L, Hayman J, Middleton M, Wilson J, Scott D, et al. Recent trends in heroin and pharmaceutical-opioid related harms in Victoria, Australia up to 2018. *Addiction*. 2019;115:261–9.
10. Editors Plos Medicine. Observational studies: getting clear about transparency. *PLoS Medicine*. 2014;11(8):e1001711-e.
11. West R. Trial protocols. *Addiction*. 2012;107(9):1544-.
12. Australian Bureau of Statistics. 3101.0 - Australian Demographic Statistics, Mar 2018. Accessed from: <http://www.abs.gov.au/ausstats/abs@.nsf/mf/3101.0>. 2018.
13. Pennington Institute. Australia's Annual Overdose Report 2019. Melbourne: Pennington Institute; 2019.
14. Department of Health & Human Services SGoV, Australia. Victorian Emergency Minimum Dataset (VEMD) 2019 [cited 2019 18 Feb]. Available from: <https://www2.health.vic.gov.au/hospitals-and-health-services/data-reporting/health-data-standards-systems/data-collections/vemd>.
15. Nielsen S, Crossin R, Middleton M, Martin C, Wilson J, Lam T, et al. Comparing rates and characteristics of ambulance attendances related to extramedical use of pharmaceutical opioids in Australia: a protocol for a retrospective observational study. *BMJ open*. 2019;9(5):e029170.
16. Rhodes AE, Bethell J, Spence J, Links PS, Streiner DL, Jaakkimainen RL. Age-sex differences in medicinal self-poisonings: a population-based study of deliberate intent and medical severity. *Social psychiatry and psychiatric epidemiology*. 2008;43(8):642-52.

17. Gunnell D, Ho D, Murray V. Medical management of deliberate drug overdose: a neglected area for suicide prevention? *Emergency medicine journal : EMJ*. 2004;21(1):35-8.
18. Nielsen S, Degenhardt L, Hoban B, Gisev N. A synthesis of oral morphine equivalents (OME) for opioid utilisation studies. *Pharmacoepidemiology and Drug Safety*. 2016;25(6):733-7.
19. Benchimol EI, Smeeth L, Guttman A, Harron K, Moher D, Petersen I, et al. The REporting of studies Conducted using Observational Routinely-collected health Data (RECORD) statement. *PLoS Medicine*. 2015;12(10):e1001885-e.
20. Peacock A, Gisev N, Memedovic S, Larance B, Brown J, Cairns R, et al. Opioid use and harms associated with a sustained-release tapentadol formulation: A post-marketing surveillance study. *Drug and Alcohol Dependence*. 2019:107697.
21. Di Rico R, Nambiar D, Stooze M, Dietze P. Drug overdose in the ED: a record linkage study examining emergency department ICD-10 coding practices in a cohort of people who inject drugs. *BMC Health Serv Res*. 2018;18(1):945.
22. Gisev N, Pearson SA, Karanges EA, Larance B, Buckley NA, Larney S, et al. To what extent do data from pharmaceutical claims under-estimate opioid analgesic utilisation in Australia? *Pharmacoepidemiology and drug safety*. 2018;27(5):550-5.
23. Hayman J, Berecki-Gisolf J, Nielsen S, Lam T. Trends in Pharmaceutical Opioid-related Harm in Victoria, 2008/09 to 2017/18. Melbourne, Australia: Victorian Injury Surveillance Unit,, Victorian Injury Surveillance Unit; 2019.
24. Slade T, Johnston A, Teesson M, Whiteford H, Burgess P, Pirkis J, et al. The mental health of Australians 2. Report on the 2007 National Survey of Mental Health and Wellbeing. Canberra: Department of Health and Ageing; 2009.
25. Australian Bureau of Statistics. Measures of Socioeconomic Status. 2011.

Table 1. Summary of the search criteria

| Free-text search                                                                                                                                                                                                                                                                                                                                                                                                                                                                                                                                                                          | AND/OR | ICD10-AM code (where drug name does not appear in the text field)                                                                                                                                                                                                                                                                                                                                                                                                                           |
|-------------------------------------------------------------------------------------------------------------------------------------------------------------------------------------------------------------------------------------------------------------------------------------------------------------------------------------------------------------------------------------------------------------------------------------------------------------------------------------------------------------------------------------------------------------------------------------------|--------|---------------------------------------------------------------------------------------------------------------------------------------------------------------------------------------------------------------------------------------------------------------------------------------------------------------------------------------------------------------------------------------------------------------------------------------------------------------------------------------------|
| <p>[ All pharmaceutical opioid drug name including variations (e.g. “Tramadol/ tramal/ zydol”, “Morphine/ MS contin/ MS mono/ kapanol/ anamorph/ sevredol”, “Oxycodone/ oxycodone/ oxy/ oxycontin/ endone/ targin/ oxynorm/ proladone/ novacodone”)</p> <p>]</p> <p>AND</p> <p>[ Overdose/poisoning terms included in the text field (e.g. ‘overdose’ ‘od’ ‘poisoning’ ‘drug abuse’ ‘toxicity’ ‘poison’ ‘self harm’ ‘suicide’)</p> <p>OR</p> <p>ICD10-AM codes for poisoning by narcotics and psychodysleptics’ appear in one of the three VEMD diagnosis codes T40.2, T40.3, T40.4 ]</p> |        | <p>The following T40 ‘poisoning by narcotics and psychodysleptics’ codes appear anywhere within the three VEMD diagnosis codes:</p> <ul style="list-style-type: none"> <li>• T40.2 - Other opioids e.g. codeine or morphine, also hydromorphone, oxycodone, opioid Not Elsewhere Classified (NEC), hydrocodone</li> <li>• T40.3 – Methadone</li> <li>• T40.4 - Other synthetic narcotics, including pethidine, Opiate NEC, buprenorphine, dextropropoxyphene, fentanyl, tramadol</li> </ul> |

Table 2. Variables and response options to be examined in association with pharmaceutical opioid-related emergency department presentations, by opioid-type.

| Category                                                     | Variable                           | Variable options                                                                                                                                                                                                                                                                                                                          |
|--------------------------------------------------------------|------------------------------------|-------------------------------------------------------------------------------------------------------------------------------------------------------------------------------------------------------------------------------------------------------------------------------------------------------------------------------------------|
| Patient demographics                                         | Age                                | ≥ 12years; extracted in five year blocks                                                                                                                                                                                                                                                                                                  |
|                                                              | Sex                                | Males, Females, Total (including other genders with cell sizes too small to be extracted separately)                                                                                                                                                                                                                                      |
|                                                              | Region                             | Metro, Regional/rural, Interstate/overseas, unknown                                                                                                                                                                                                                                                                                       |
|                                                              | Country of birth                   | Australia, overseas (presented as an English speaking country, or non-English speaking country if cell sizes allow). The 12 month substance use disorder prevalence is 6% for Australian born residents, 4.4% if the birthplace was another English-speaking country, and 1.6% for a non-English speaking country (24).                   |
|                                                              | Patient SEIFA                      | Socio-Economic Indexes for Areas (SEIFA) is a proxy measure for socio-economic status based on home postcode (25). Australians living in the lowest socio-economic areas have the highest burden of disease and highest rates of opioid prescriptions (2).                                                                                |
| Context of presentation (intent of use, indicator of misuse) | Human intent                       | <ul style="list-style-type: none"> <li>i. Unintentional</li> <li>ii. Intentional self-harm</li> <li>iii. Assault, maltreatment &amp; neglect</li> <li>iv. Other &amp; undetermined intent</li> </ul>                                                                                                                                      |
| Admission outcome (proxy of severity)                        |                                    | <ul style="list-style-type: none"> <li>i. Discharge to home/ returning to usual residence</li> <li>ii. Admission to ward/ procedure room - this campus (note, this is also a proxy for clinical severity)</li> <li>iii. Transfer to another hospital campus</li> <li>iv. Departure before treatment completed</li> </ul>                  |
| Triage severity of presentation (proxy of severity)          | Australasian Triage Scale Category | <p>Each of the five categories relates to treatment acuity and the maximum waiting time for medical assessment and treatment.</p> <ul style="list-style-type: none"> <li>i. ATS 1 (Immediate)</li> <li>ii. ATS 2 (10 minutes)</li> <li>iii. ATS 3 (30 minutes)</li> <li>iv. ATS 4 (60 minutes)</li> <li>v. ATS 5 (120 minutes)</li> </ul> |

# BMJ Open

## Comparing rates and characteristics of emergency department presentations related to pharmaceutical opioid poisoning in Australia: a study protocol for a retrospective observational study

|                                 |                                                                                                                                                                                                                                                                                                                                                                                                                                                                                                                                                                    |
|---------------------------------|--------------------------------------------------------------------------------------------------------------------------------------------------------------------------------------------------------------------------------------------------------------------------------------------------------------------------------------------------------------------------------------------------------------------------------------------------------------------------------------------------------------------------------------------------------------------|
| Journal:                        | <i>BMJ Open</i>                                                                                                                                                                                                                                                                                                                                                                                                                                                                                                                                                    |
| Manuscript ID                   | bmjopen-2020-038979.R1                                                                                                                                                                                                                                                                                                                                                                                                                                                                                                                                             |
| Article Type:                   | Protocol                                                                                                                                                                                                                                                                                                                                                                                                                                                                                                                                                           |
| Date Submitted by the Author:   | 16-Jul-2020                                                                                                                                                                                                                                                                                                                                                                                                                                                                                                                                                        |
| Complete List of Authors:       | Lam, Tina; Monash University Eastern Clinical Research Unit, Monash Addiction Research Centre<br>Hayman, Jane; Monash University, Victorian Injury Surveillance Unit; Monash University Accident Research Centre<br>Berecki-Gisolf, Janneke; Monash University, Monash Injury Research Institute<br>Sanfilippo, Paul; Monash University, Monash Addiction Research Institute<br>Lubman, D; Monash University, Eastern Health Clinical School<br>Nielsen, Suzanne; Monash University Eastern Clinical Research Unit, Monash Addiction Research Centre; UNSW Sydney, |
| <b>Primary Subject Heading</b>: | Addiction                                                                                                                                                                                                                                                                                                                                                                                                                                                                                                                                                          |
| Secondary Subject Heading:      | Public health, Epidemiology                                                                                                                                                                                                                                                                                                                                                                                                                                                                                                                                        |
| Keywords:                       | Pain management < ANAESTHETICS, EPIDEMIOLOGY, PSYCHIATRY, Substance misuse < PSYCHIATRY, Suicide & self-harm < PSYCHIATRY, PUBLIC HEALTH                                                                                                                                                                                                                                                                                                                                                                                                                           |
|                                 |                                                                                                                                                                                                                                                                                                                                                                                                                                                                                                                                                                    |

SCHOLARONE™  
Manuscripts



I, the Submitting Author has the right to grant and does grant on behalf of all authors of the Work (as defined in the below author licence), an exclusive licence and/or a non-exclusive licence for contributions from authors who are: i) UK Crown employees; ii) where BMJ has agreed a CC-BY licence shall apply, and/or iii) in accordance with the terms applicable for US Federal Government officers or employees acting as part of their official duties; on a worldwide, perpetual, irrevocable, royalty-free basis to BMJ Publishing Group Ltd ("BMJ") its licensees and where the relevant Journal is co-owned by BMJ to the co-owners of the Journal, to publish the Work in this journal and any other BMJ products and to exploit all rights, as set out in our [licence](#).

The Submitting Author accepts and understands that any supply made under these terms is made by BMJ to the Submitting Author unless you are acting as an employee on behalf of your employer or a postgraduate student of an affiliated institution which is paying any applicable article publishing charge ("APC") for Open Access articles. Where the Submitting Author wishes to make the Work available on an Open Access basis (and intends to pay the relevant APC), the terms of reuse of such Open Access shall be governed by a Creative Commons licence – details of these licences and which [Creative Commons](#) licence will apply to this Work are set out in our licence referred to above.

Other than as permitted in any relevant BMJ Author's Self Archiving Policies, I confirm this Work has not been accepted for publication elsewhere, is not being considered for publication elsewhere and does not duplicate material already published. I confirm all authors consent to publication of this Work and authorise the granting of this licence.

1  
2  
3 **Comparing rates and characteristics of emergency department**  
4 **presentations related to pharmaceutical opioid poisoning in**  
5 **Australia: a study protocol for a retrospective observational study**  
6  
7  
8  
9

10 Running title: Comparing ED poisoning presentations across pharmaceutical opioids  
11

12  
13 Tina Lam<sup>1</sup>, Jane Hayman<sup>2</sup>, Janneke Berecki-Gisolf<sup>2</sup>, Paul Sanfilippo<sup>1,3</sup>, Dan I Lubman<sup>1,3</sup>,  
14 Suzanne Nielsen<sup>1,3</sup>.  
15

- 16  
17  
18 1. Monash Addiction Research Centre, Eastern Health Clinical School, Monash University, Peninsula Campus,  
19 Moorooduc Hwy, Frankston, 3199, Victoria, Australia.  
20 2. Victorian Injury Surveillance Unit, Monash University Accident Research Centre, Monash University, 21 Alliance  
21 Ln, Clayton VIC 3800, Australia  
22 3. Turning Point, Eastern Health Clinical School, Monash University, 110 Church St, Richmond 3121, Victoria,  
23 Australia.  
24

25  
26 Corresponding author:

27 A/Professor Suzanne Nielsen

28 Level 3 Building G, 47-49 Moorooduc Highway, Frankston, VIC 3199 Australia

29 [suzanne.nielsen@monash.edu](mailto:suzanne.nielsen@monash.edu)  
30

31 +61 3 9904 4641  
32  
33  
34  
35

36 **Declarations of competing interests**  
37

38 In the past 5 years, SN has been an investigator on untied education grants from Indivior,  
39 unrelated to the current work. SN has provided training to health care professionals on  
40 identifying and treating codeine dependence for which her institution has received payment  
41 from Indivior. DL has received speaking honoraria from the following: Astra Zeneca,  
42 Indivior, Janssen-Cilag, Lundbeck, Servier and Shire, and has participated on Advisory  
43 Boards for Indivior and Lundbeck.  
44  
45  
46  
47  
48  
49

50 **Funding**  
51

52 The study is funded by an untied educational grant from Seqirus. SN is the recipient of an  
53 NHMRC Career Development Fellowship (#1163961). The funders will have no role in the  
54 study design, study conduct, analysis or data interpretation. Prior to publication, Seqirus will  
55 have the opportunity to review the manuscript and provide comment on factual inaccuracies,  
56 if identified.  
57  
58  
59  
60

## Abstract

### INTRODUCTION AND AIMS

Pharmaceutical opioids are an important contributor to the global ‘opioid crisis’, and are implicated in 70% of Australia’s opioid-related mortality. However, there have been few studies which consider the relative contribution of different pharmaceutical opioids to harm. We aim to compare commonly used pharmaceutical opioids in terms of (1) rates of harm, and (2) demographic and clinical characteristics associated with that harm.

### METHOD AND ANALYSIS

Observational study of emergency department presentations for non-fatal poisoning related to pharmaceutical opioid use. Data from 2009-2019 will be extracted from the Victorian Emergency Minimum Dataset (VEMD) which contains data from public hospitals with dedicated emergency departments in Victoria, Australia’s second most populous state. A combination of free-text and ICD-10 codes will be used to identify relevant cases, with manual screening of each case to confirm relevance. We will calculate supply-adjusted rates of presentations using Poisson regression for all pharmaceutical opioid cases identified, separately for nine commonly prescribed pharmaceutical opioids (Buprenorphine, Codeine, Fentanyl, Methadone, Morphine, Oxycodone, Oxycodone-naloxone, Tapentadol, Tramadol), and for a multiple opioid category. We will use multinomial logistic regression to compare demographic and clinical characteristics, such as triage category, across opioid types.

### ETHICS AND DISSEMINATION

This work is conducted under approval 21427 from the Monash University Human Research Ethics Committee for ongoing injury surveillance. As per conditions of approval, cells of <5 will not be reported, though zeroes will be preserved. We will present project findings in a peer-reviewed journal article as well as at relevant scientific conferences.

### TRIAL REGISTRATION NUMBER

osf.io/t7mju

### KEYWORDS

Pharmaceutical opioids; Emergency Department; Overdose; Oxycodone; Tapentadol.

### WORD COUNT



1  
2  
3 3407 (excluding Tables)  
4  
5

6 **ARTICLE SUMMARY**  
7

8 **Strengths and Limitations**  
9

10 *Strengths*

- 11
- 12 • Indicator of population level opioid harm
  - 13 • Cases have been selected using ICD-codes and free text searches, increasing the
  - 14 capture of relevant cases over studies that use ICD codes alone
  - 15
  - 16 • Manual confirmation of individual case eligibility, as opposed to assuming eligibility
  - 17 via ICD-code or keyword alone
  - 18
  - 19 • Inclusion of 9 different types of pharmaceutical opioids
  - 20
  - 21
  - 22

23 *Limitations*

- 24
- 25 • Around two thirds of opioid-related cases have a specific opioid recorded, enabling
  - 26 inclusion in our analysis. One third do not. This means that the rates of poisoning are
  - 27 almost certainly an underestimation, though we have no reason to believe that this
  - 28 would create a bias in comparisons between individual opioids.
  - 29
  - 30
  - 31
  - 32
  - 33
  - 34
  - 35
  - 36
  - 37
  - 38
  - 39
  - 40
  - 41
  - 42
  - 43
  - 44
  - 45
  - 46
  - 47
  - 48
  - 49
  - 50
  - 51
  - 52
  - 53
  - 54
  - 55
  - 56
  - 57
  - 58
  - 59
  - 60

## Introduction

Over the past two decades, opioid-related deaths have rapidly escalated in high income regions, and despite a range of preventative strategies being trialled, the situation continues to worsen (1). Every day in Australia, there are almost 150 hospitalisations for opioid harms (2), and there was a 30% increase in US Emergency Department (ED) visits for opioid overdoses from 2016-2017 (3). Given substantial harms are attributed to pharmaceutical opioids (e.g. 70% of opioid-related mortality in Australia) (4), this has highlighted how important it is to understand the risk profiles associated with individual opioids.

Recent US research has revealed the risk profile of some pharmaceutical opioids may vary by potency (5). Similar research using Australian ambulance attendance data found that different pharmaceutical opioids have distinct patterns of harm (6). For example, the highest rates of opioid-related ambulance attendance were accounted for by the lowest potency opioid, different opioids were associated with accidental overdoses versus suicidal intent, and the availability and formulation of the opioid appeared important in explaining patterns of harm (6).

There is a need for further research to extend these findings with other datasets, and particularly to focus on the outcome of opioid poisoning. Opioid poisoning is also referred to as 'opioid overdose', and is an acute condition resulting from the absorption of excessive amounts of opioids into the body (7). Non-fatal overdose is associated with increased risk of later fatal overdose, and is estimated to occur 13-30 times more frequently than fatal overdose (8, 9).

ED data is routinely used to monitor for trends in opioid poisoning (3). Although some studies have disaggregated results by heroin and pharmaceutical opioids (10), few ED studies have differentiated between the individual pharmaceutical opioids involved. Relative harms with pharmaceutical opioids have been examined through coded ambulance attendances (6), however there are many patients who self-present to the ED without the use of an ambulance service, and these patients may represent a unique population.

This paper outlines a study to better understand pharmaceutical opioid poisonings treated within EDs to inform clinical treatment and prevention strategies.

1  
2  
3  
4  
5 We write this protocol to maximize transparency (11, 12) as the study is supported by an  
6 untied educational grant from Seqirus, who are the Australian distributors of Palexia®  
7 (tapentadol) and Tramal® (tramadol). Tapentadol was introduced to the Australian market in  
8 2011, subsidised in 2013, and is currently the fourth most commonly prescribed opioid in  
9 Victoria (6).  
10  
11  
12  
13  
14  
15  
16  
17  
18  
19  
20  
21  
22  
23  
24  
25  
26  
27  
28  
29  
30  
31  
32  
33  
34  
35  
36  
37  
38  
39  
40  
41  
42  
43  
44  
45  
46  
47  
48  
49  
50  
51  
52  
53  
54  
55  
56  
57  
58  
59  
60

For peer review only

## Methods

### *Study aims*

The proposed study has two key objectives:

- (1) To compare the supply-adjusted rates between 2009 and 2019 for Victorian ED opioid poisoning presentations across nine common pharmaceutical opioids and one ‘multiple opioid’ category
- (2) To examine demographics and other presentation characteristics including severity and context for opioid poisoning presentations with different pharmaceutical opioids

We will answer the following research questions:

1. Do the supply-adjusted rates of ED presentations differ over time and across pharmaceutical opioids?
2. Does the severity of presentation (as measured by triage category) or other characteristics vary by opioid type?

### *Study Design*

The study design is a retrospective observational study that uses administrative emergency department data. Existing pharmaceutical opioid-poisoning related emergency department presentations are identified, coded, and supply-adjusted rates are calculated to compare harms across opioids commonly prescribed within Australia including fentanyl, buprenorphine, oxycodone, oxycodone-naloxone, codeine, morphine, methadone, tramadol and tapentadol.

### *Study population*

Data come from public ED presentations in Victoria, Australia’s second most populous jurisdiction, representing 26% of the Australian population (13). Victoria’s per capita rate for unintentional pharmaceutical-opioid induced deaths is comparable with other Australian jurisdictions (14), and previous work demonstrated that Victorian rates of ambulance attendance for extramedical pharmaceutical opioid use were broadly consistent with other jurisdictions (6). Australia has the eighth highest per capita licit pharmaceutical opioid consumption in the world (2).

This population-wide study has a catchment area of the entire Victorian state, for the past 10 years (July 2009 – June 2019), for individuals aged 12 years of age and older. Data will be

1  
2  
3 obtained from all 38 public hospitals with a 24 hour ED contributing to the VEMD (the  
4 Victorian Emergency Minimum Dataset).  
5  
6  
7

### 8 *Emergency Department data*

9  
10 Australia has a universal health care scheme which covers the cost of public hospital services  
11 (15). It is mandatory for all public ED presentations in the state of Victoria to be entered into  
12 the Victorian Emergency Minimum Dataset (VEMD) by ED staff (16). The database is  
13 managed by the state government's Department of Health and Human Services (16). .  
14  
15  
16

17  
18 The VEMD (16) captures ED presentations related to drug poisoning and overdose, an  
19 important population level indicator of opioid-related harm. Using approaches consistent with  
20 previous work with ambulance datasets (17), these ED data provide a useful way to identify if  
21 harms are emerging with specific pharmaceutical drugs, and to understand the nature of these  
22 harms. These data can inform both the relative frequency and severity of presentations  
23 associated with different pharmaceutical opioids. These findings will complement previous  
24 work (17), and when these reports are considered together, will advance our knowledge on  
25 the prevalence and severity of opioid-related harms involving different pharmaceutical  
26 opioids.  
27  
28  
29  
30  
31  
32  
33

34  
35 The VEMD manual (16) documents the standardised procedures used to ensure the accuracy,  
36 validity, completeness and coherence of captured and reported data across datasets and over  
37 time. These procedures include that data submitted by the health services is checked for valid  
38 values and compliance with VEMD business rules, and a requirement for corrections and  
39 resubmissions until the service has a 'clean' (zero rejection) submission. The Department of  
40 Health and Human Services circulates a monthly compliance report to monitor the  
41 completeness of submissions to the VEMD, runs regular analyses, and sends out compliance  
42 emails when reporting deadlines are missed. The VEMD is also subject to audits by the  
43 Health Data Integrity Unit in the Victorian Agency for Health Information.  
44  
45  
46  
47  
48  
49  
50  
51

52  
53 In addition to data quality systems with the VEMD database, an experienced data analyst will  
54 manually check all extracted cases to ensure there are no inconsistencies between coded cases  
55 and the narrative (i.e. excluding cases where only non-opioid drugs are stated in the narrative)  
56 to confirm the ED presentation relates to a pharmaceutical opioid overdose or poisoning.  
57  
58  
59  
60

### *Opioids of interest*

We will extract all VEMD records pertaining to pharmaceutical opioid poisoning, and concentrate our analyses on the subset of data where the specific pharmaceutical opioid(s) involved in the presentation is documented.

We will analyse the data by nine specific opioids, with a tenth category for presentations involving multiple-opioids. The opioid categories we will analyse are: (i) Buprenorphine, (ii) Codeine (iii) Fentanyl, (iv) Methadone, (v) Morphine, (vi) Oxycodone, (vii) Oxycodone-naloxone, (viii) Tapentadol, (ix) Tramadol, (x) Multiple opioids.

The first nine categories represent the opioids most commonly used for analgesia in outpatient settings in Australia. Our previous work demonstrated that less common drugs such as pethidine and dextropropoxyphene are captured in too few numbers to report on, given the requirement to suppress cell sizes of less than five (6). We will not examine opioids that are rarely used (e.g. dextropropoxyphene), not available in Australia (such as hydrocodone), and those used only in inpatient settings (such as alfentanil and sufentanil).

Based on previous research with ambulance attendances we expect records involving multiple pharmaceutical opioids will represent less than 10% of cases (6). Given the small expected numbers, the inclusion of the 'multiple opioids' group is not expected to affect conclusions drawn from the study. We will quantify the individual opioids within the multiple opioid category, but not attempt to attribute outcomes to individual opioids within the multiple opioid category.

### *Case identification and coding*

Records of opioid-poisoning cases from July 2009 to June 2019 will be extracted from the VEMD by the Victorian Injury Surveillance Unit (VISU) at Monash University in April/May 2020 following external protocol peer review.

1  
2  
3 Inclusion of a case is based on the documentation that the opioid was involved in the ED  
4 presentation, and this is established based on the 1) narrative data recorded in the VEMD,  
5 and/or 2) and International Classification of Diseases 10th Revision, Australian modification  
6 (ICD10-AM) poisoning diagnosis codes T40.2, T40.3, T40.4 (see Table 1 for an overview).  
7  
8  
9

### 10 11 **Selection of narrative cases**

12  
13 A text search will be conducted of the 'Description of Event' variable, which contains a text  
14 narrative describing the opioid type and circumstances of the injury (presence of overdose or  
15 poisoning). The first part of the text search will be for drug names and brand names, and  
16 cases will be coded into individual opioid types (e.g. codeine, methadone). Next, individual  
17 opioid types will be further coded as a poisoning or overdose if a) the following terms are  
18 listed in the 'Description of Event' text variable: 'overdose' 'od' 'o/d' 'poisoning' 'drug  
19 abuse' 'toxicity' 'poison' 'self harm' 'suicide' OR b) there is an ICD10-AM T40 'poisoning  
20 by narcotics and psychodysleptics' code anywhere within the three VEMD diagnosis codes.  
21  
22  
23  
24  
25  
26  
27  
28

### 29 **Selection of ICD10-AM coded cases**

30  
31 Where the 'Description of Injury Event' variable does not contain a drug name (i.e. not  
32 selected via the narrative search described above), cases of pharmaceutical opioid poisoning  
33 will be detected using relevant ICD10-AM codes. The VEMD injury data is coded according  
34 to the National Minimum Data Standards for Injury Surveillance with diagnoses coded  
35 according to the ICD-10-AM (16). As most of these cases do not contain opioid-specific  
36 information it is anticipated they will be included in the "all pharmaceutical opioid"  
37 overdoses category, but not included in the opioid-specific analyses.  
38  
39  
40  
41  
42  
43

44 The following ICD10-AM T40 'poisoning by narcotics and psychodysleptics' codes will be  
45 searched for anywhere within the three VEMD diagnosis codes:

- 46 ○ T40.2 - Other opioids e.g. codeine or morphine, also hydromorphone,  
47 oxycodone, opioid Not Elsewhere Classified (NEC), hydrocodone
- 48 ○ T40.3 – Methadone
- 49 ○ T40.4 - Other synthetic narcotics, including pethidine, Opiate NEC,  
50 buprenorphine, dextropropoxyphene, fentanyl, tramadol
- 51
- 52
- 53
- 54
- 55
- 56

57 Cases will be selected for all intent groups (unintentional, intentional self-harm, assault,  
58 maltreatment & neglect, other & undertermined intent). Consistent with previous overdose  
59  
60

1  
2  
3 research, cases will be restricted to those aged 12 years and over to omit cases of accidental  
4 poisoning by children (18, 19). This age limit means that it is likely most individuals who  
5 used the pharmaceutical opioid were aware it was a drug.  
6  
7

### 8 *Pharmaceutical opioid sales data*

9  
10 The utilisation of individual opioids will be estimated through the sale of each opioid to  
11 Victorian community pharmacies. This sales data (unit sales by strength of product for each  
12 of the opioids involved) will be accessed via a third party access agreement with the  
13 multinational health information and clinical research company IQVIA (iqvia.com). Sales  
14 data will represent the entire Victorian population (i.e. population level data) and do not  
15 contain individual identifiers.  
16  
17  
18  
19

20  
21 The total amount of each opioid supplied per month will be calculated in milligrams, and  
22 converted into Oral Morphine Equivalents (OME) so the analgesic effect of different opioids  
23 can be represented on the same scale (20). We will then use these OME to calculate a supply-  
24 adjusted rate of ED presentations, a method consistent with previous studies of  
25 pharmaceutical opioid related harm (4, 5).  
26  
27  
28  
29

### 30 *Statistical Analysis*

31  
32 Descriptive statistics will be used to summarise prescription opioid-related ED presentations  
33 (e.g. annual supply-adjusted rates for each opioid in Victoria, for each year in the study  
34 period). Units will be presentations per 100 000mg OME (20). Confidence intervals for rates  
35 will be calculated using the exact method based on the Poisson distribution. Statistics based  
36 on numbers less than five will not be reported, however, zeroes are preserved. Data may be  
37 aggregated (e.g. reported quarterly rather than by month) to ensure cell sizes of at least five.  
38  
39  
40  
41  
42  
43

### 44 *Aim 1 analysis plan – supply-adjusted rates of harm*

45  
46 Poisson regression will be used to generate Incident Rate Ratios with 95% CIs for overall  
47 supply adjusted rates, allowing for simultaneous estimation of individual opioid effect sizes  
48 and their change over time. This will permit statistical comparisons of differences in supply-  
49 adjusted rates across different opioids. Averaged monthly rates of presentations by year  
50 examined for each pharmaceutical opioid will be reported. Rates of presentations will be  
51 calculated based on either monthly or three-month intervals (or longer time intervals if  
52 required, to enable minimum cell sizes of five), adjusted for supply of that opioid using  
53 Victorian pharmaceutical sales data. Where cell sizes are <5, to preserve anonymity, we will  
54  
55  
56  
57  
58  
59  
60



1  
2  
3 report the average of all cells with 1-4 cases, rather than the actual number of cases in that  
4 cell.  
5  
6  
7

### 8 *Aim 2 analysis plan – characteristics of ED presentations*

9

10  
11 We will use multinomial logistic regression to analyse opioid-poisoning characteristics.  
12 Characteristics include the patient demographics of age, sex, region, country of birth and  
13 socio-economic status; and the presentation characteristics of whether the overdose was  
14 intentional, admission outcome, and clinical severity (Table 2). Separate regressions will be  
15 run with each attendance characteristic serving as the primary independent variable. Opioid  
16 type will be the outcome variable in all regressions with morphine, a mid-potency opioid  
17 commonly used as a standard reference for calculating opioid doses (21), as the reference  
18 category. Results will be expressed as the estimated odds of each opioid (relative to  
19 morphine) being involved in the ED presentation for a particular attendance characteristic. In  
20 addition, year will be included as an independent variable in all regressions to assess whether  
21 characteristics changed over time – the potential of time as an effect modifier in the  
22 relationship between the attendance characteristic and opioid type will be evaluated by testing  
23 the statistical interaction between the two independent variables in the regression model.  
24 When considering the triage severity, the model will be also be adjusted for by age and sex,  
25 in addition to other characteristics identified in univariate analyses to be associated with  
26 severity of overdose. VEMD categories will be aggregated where necessary to ensure that all  
27 analyses report cell sizes of at least five.  
28  
29  
30  
31  
32  
33  
34  
35  
36  
37  
38  
39  
40  
41

42 All quantitative analyses will be conducted in SAS or Stata, with p values less than 0.05  
43 considered significant.  
44  
45  
46  
47

### 48 *Handling known or expected missing data*

49

50 To minimise missing data to enable us to preserve reportable cells for aim 1 (i.e. no cell less  
51 than 5) we will aggregate the data into multiple month blocks (e.g. 3-monthly periods) as we  
52 anticipate some opioids will have low counts in individual months and these data would not  
53 be able to be reported.  
54  
55  
56  
57

58 In calculating rates of presentations, if the numerator is less than 10 for the analysis period,  
59 we will aggregate the available data over multiple periods, for example, to provide an  
60

1  
2  
3 estimate of the rate for the past year rather than a 3-month block, using standard procedures  
4 developed by the data custodians to ensure confidentiality with reported data.  
5  
6  
7

8 Deaths in hospital would be recorded in the VEMD. It is of note however, that these are very  
9 rare. Deaths on arrival at ED are even rarer – five or less have been recorded for all causes in  
10 the VEMD database in the past 10 years. As such, we will not include deaths in our primary  
11 analyses due to limitations on reporting small cell sizes.  
12  
13  
14  
15

### 16 *Ethics*

17 Ethics approval was obtained from the Monash University Human Research Ethics  
18 Committee for VISU to analyse VEMD data for injury surveillance purposes (21427).  
19 This approval requires strict conditions for the storage, retention and use of the VEMD data  
20 to protect privacy and confidentiality and all unit level data is stored and analysed onsite at  
21 VISU. Due to the sensitivity and potentially identifiable nature of the data line item data  
22 cannot be provided to researchers outside the VISU without additional ethical approval. As  
23 per standard procedures with the data custodians, cells of <5 will not be reported, though  
24 zeroes will be preserved. The sales data is held by IQVIA and ethics approval is not required  
25 for the use and publication of sales data.  
26  
27  
28  
29  
30  
31  
32  
33  
34  
35

### 36 *Data statement*

37 Researchers interested in using these data may approach VISU and IQVIA. Access fees for  
38 data and/or analyses may apply.  
39  
40  
41  
42

### 43 *Dissemination*

44 We will present project findings in a peer-reviewed journal article as well as at relevant  
45 scientific conferences. Findings will be reported in accordance with the REporting of studies  
46 Conducted using Observational Routinely-collected health Data (RECORD) statement, an  
47 extension of the STROBE statement for reporting items specific to observational studies  
48 using routinely collected health data (22).  
49  
50  
51  
52

### 53 *Patient and public Involvement*

54 Patients and the public were not involved in the design of the study.  
55  
56  
57  
58  
59  
60

1  
2  
3  
4  
5  
6  
7  
8  
9  
10  
11  
12  
13  
14  
15  
16  
17  
18  
19  
20  
21  
22  
23  
24  
25  
26  
27  
28  
29  
30  
31  
32  
33  
34  
35  
36  
37  
38  
39  
40  
41  
42  
43  
44  
45  
46  
47  
48  
49  
50  
51  
52  
53  
54  
55  
56  
57  
58  
59  
60

For peer review only

## Discussion

This study aims to compare rates and characteristics of harm related to specific pharmaceutical opioids. Emergency Department presentations for opioid poisoning will be compared across nine of the most commonly used pharmaceutical opioids in Australia.

### *Strengths*

These findings will provide a detailed understanding of the relative contribution of well-established and newer pharmaceutical opioids to poisonings in Victoria, which to date have only been examined as a category of 'pharmaceutical opioids', or by the three ICD-10 categories Methadone, 'Other opioids' (e.g. codeine or morphine, oxycodone) and other synthetic narcotics (e.g. tramadol, fentanyl). These coding typically do not enable disaggregation of opioids with very different profiles (such as tramadol and fentanyl) nor have they been able to examine newer opioids with limited postmarketing surveillance such as tapentadol, which have seen large increases in prescribing in recent years (6, 23).

Emergency department presentations are used to provide a robust (but conservative) overview of opioid poisoning in Victoria. The dataset represents the population of Victoria (as represented by the hospitals that contribute to the VEMD) and will give the most complete picture of types of pharmaceutical opioid poisoning in ED settings in Victoria to date.

ED data is a population level measure that reflects real world harms with a broader capture than abuse liability studies, clinical trials, or spontaneous adverse event reporting systems. Opioid poisoning is a key measure of opioid-related harm that is driving policy change in Australia. These data are carefully hand coded and can inform both the relative frequency and severity of presentations associated with different pharmaceutical opioids. Importantly, this study will extract data using free-text searches as well as ICD-codes, the latter of which has been determined to substantially underestimate drug related harms in Victorian EDs (10, 24). Furthermore, every case will be manually checked to confirm it represents a pharmaceutical opioid poisoning.

Sales data is more inclusive than prescription data as it includes private prescription items and items that can be sold over the counter. Up to a fifth of opioids are not accounted for by

1  
2  
3 government subsidised prescriptions (25), and this disproportionately affects some opioids  
4 such as codeine and tapentadol. So, the use of sales data will more closely approximate  
5 supply and actual use compared with the use of prescription subsidy data.  
6  
7

8 This study will complement other research conducted comparing harms across  
9 pharmaceutical opioids. We will specifically examine ED opioid poisoning in this study,  
10 while previous research has examined a range of ambulance-attended opioid-related harms  
11 (6). Both supply-adjusted rates of harm will be available for triangulation for a similar time  
12 period within the state of Victoria providing a more comprehensive understanding of harms.  
13  
14  
15  
16  
17

### 18 19 *Limitations*

20 Reliable details on the source of opioid or nature of use are not routinely recorded in the  
21 VEMD, so details such as whether harms are related to nonmedical use versus therapeutic use  
22 will not be able to be explored. Similarly, the source of the drug is not typically recorded by  
23 the ED clinician as it is not a required clinical field in the database. As these are not  
24 consistently coded or reliable variables we do not intend to use them in this analysis. As such,  
25 these findings will primarily provide information on rates and characteristics of opioid  
26 poisoning presentations rather than the context of use.  
27  
28  
29  
30  
31  
32  
33

34 The rates calculated using VEMD data are expected to underrepresent total pharmaceutical  
35 opioid-poisonings. Firstly, around one third of ED opioid cases do not have a specific opioid  
36 documented (26) - for example due to lack of detailed ICD10-AM codes for each drug type,  
37 or as the coder is unable to ascertain the type of opioid involved. This may lead to an  
38 underestimation of the rates of harm for each opioid, though we do not expect this to  
39 introduce bias to specific opioids. Secondly, the data will not capture overdoses managed  
40 outside the ED e.g. by paramedics and patient was not transferred on to the ED, noting that  
41 these are captured elsewhere (6), or not captured by a medical professional.  
42  
43  
44  
45  
46  
47  
48  
49

50 Finally, there may be unmeasured confounders such as the likelihood of an individual being  
51 prescribed a specific opioid that we cannot account for using a naturalistic study design. It is  
52 of note however, patients who use opioids extramedically are usually excluded from the trials  
53 which are able to randomise potential confounders.  
54  
55  
56  
57  
58  
59  
60

1  
2  
3 While the analysis will underrepresent total opioid-related harm in the general population, it  
4 will give the most complete picture of pharmaceutical opioid poisoning in ED settings.  
5  
6  
7

### 8 *Author contributions*

9

10 SN conceptualised the study with input into the study design from TL, PS, JH and JBG. TL  
11 wrote the initial draft, which was revised with input from in collaboration with SN, TL, PS,  
12 JH, JBG and DL. PS developed the analysis plan with input from all authors. All authors  
13 have read and approved the revised protocol manuscript.  
14  
15  
16  
17  
18  
19  
20  
21  
22  
23  
24  
25  
26  
27  
28  
29  
30  
31  
32  
33  
34  
35  
36  
37  
38  
39  
40  
41  
42  
43  
44  
45  
46  
47  
48  
49  
50  
51  
52  
53  
54  
55  
56  
57  
58  
59  
60

For peer review only

## References

1. Seth P, Scholl L, Rudd RA, Bacon S. Overdose Deaths Involving Opioids, Cocaine, and Psychostimulants - United States, 2015-2016. *MMWR Morbidity and mortality weekly report*. 2018;67(12):349-58.
2. Australian Institute for Health and Welfare. Opioid harm in Australia and comparisons between Australia and Canada. 2018.
3. Vivolo-Kantor AM, Seth P, Gladden RM, Mattson CL, Baldwin GT, Kite-Powell A, et al. Vital Signs: Trends in Emergency Department Visits for Suspected Opioid Overdoses — United States, July 2016–September 2017. *US Department of Health and Human Services/Centers for Disease Control and Prevention*; 2018 March 9 2018. Contract No.: US Department of Health and Human Services/Centers for Disease Control and Prevention 9, 2018 / Vol. 67 / No. 9.
4. Roxburgh A, Hall WD, Dobbins T, Gisev N, Burns L, Pearson S, et al. Trends in heroin and pharmaceutical opioid overdose deaths in Australia. *Drug & Alcohol Dependence*. 2017;179:192-8.
5. Murphy DL, Lebin JA, Severtson SG, Olsen HA, Dasgupta N, Dart RC. Comparative Rates of Mortality and Serious Adverse Effects Among Commonly Prescribed Opioid Analgesics. *Drug Saf*. 2018;41(8):787-95.
6. Nielsen S, Crossin R, Middleton M, Lam T, Wilson J, Scott D, et al. Comparing rates and characteristics of ambulance attendances related to extramedical use of pharmaceutical opioids in Victoria, Australia from 2013-2018. *Addiction*. 2020.
7. World Health Organization. Community management of opioid overdose. Geneva, Switzerland: WHO Document Production Services; 2014.
8. Caudarella A, Dong H, Milloy MJ, Kerr T, Wood E, Hayashi K. Non-fatal overdose as a risk factor for subsequent fatal overdose among people who inject drugs. *Drug Alcohol Depend*. 2016;162:51-5.
9. Stoope MA, Dietze PM, Jolley D. Overdose deaths following previous non-fatal heroin overdose: record linkage of ambulance attendance and death registry data. *Drug Alcohol Rev*. 2009;28(4):347-52.
10. Lam T, Kuhn L, Hayman J, Middleton M, Wilson J, Scott D, et al. Recent trends in heroin and pharmaceutical-opioid related harms in Victoria, Australia up to 2018. *Addiction*. 2019;115(2):261–9.
11. Editors Plos Medicine. Observational studies: getting clear about transparency. *PLoS Medicine*. 2014;11(8):e1001711-e.
12. West R. Trial protocols. *Addiction*. 2012;107(9):1544-.
13. Australian Bureau of Statistics. 3101.0 - Australian Demographic Statistics, Mar 2018. Accessed from: <http://www.abs.gov.au/ausstats/abs@.nsf/mf/3101.0>. 2018.
14. Pennington Institute. Australia's Annual Overdose Report 2019. Melbourne: Pennington Institute; 2019.
15. Australian Institute for Health and Welfare. Australia's health 2018 Canberra: Australian Institute for Health and Welfare; 2018.
16. Department of Health and Human Services. Victorian Emergency Minimum Dataset (VEMD): State Government of Victoria, Australia; 2019 [cited 2019 18 Feb]. Available from: <https://www2.health.vic.gov.au/hospitals-and-health-services/data-reporting/health-data-standards-systems/data-collections/vemd>.
17. Nielsen S, Crossin R, Middleton M, Martin C, Wilson J, Lam T, et al. Comparing rates and characteristics of ambulance attendances related to extramedical use of pharmaceutical opioids in Australia: a protocol for a retrospective observational study. *BMJ open*. 2019;9(5):e029170.

18. Rhodes AE, Bethell J, Spence J, Links PS, Streiner DL, Jaakkimainen RL. Age-sex differences in medicinal self-poisonings: a population-based study of deliberate intent and medical severity. *Social psychiatry and psychiatric epidemiology*. 2008;43(8):642-52.
19. Gunnell D, Ho D, Murray V. Medical management of deliberate drug overdose: a neglected area for suicide prevention? *Emergency medicine journal : EMJ*. 2004;21(1):35-8.
20. Nielsen S, Degenhardt L, Hoban B, Gisev N. A synthesis of oral morphine equivalents (OME) for opioid utilisation studies. *Pharmacoepidemiology and Drug Safety*. 2016;25(6):733-7.
21. Nielsen S, Degenhardt L, Hoban B, Gisev N. A synthesis of oral morphine equivalents (OME) for opioid utilisation studies. *Pharmacoepidemiology and drug safety*. 2016;25(6):733-7.
22. Benchimol EI, Smeeth L, Guttman A, Harron K, Moher D, Petersen I, et al. The REporting of studies Conducted using Observational Routinely-collected health Data (RECORD) statement. *PLoS Medicine*. 2015;12(10):e1001885-e.
23. Peacock A, Gisev N, Memedovic S, Larance B, Brown J, Cairns R, et al. Opioid use and harms associated with a sustained-release tapentadol formulation: A post-marketing surveillance study. *Drug and Alcohol Dependence*. 2019:107697.
24. Di Rico R, Nambiar D, Stoove M, Dietze P. Drug overdose in the ED: a record linkage study examining emergency department ICD-10 coding practices in a cohort of people who inject drugs. *BMC Health Serv Res*. 2018;18(1):945.
25. Gisev N, Pearson SA, Karanges EA, Larance B, Buckley NA, Larney S, et al. To what extent do data from pharmaceutical claims under-estimate opioid analgesic utilisation in Australia? *Pharmacoepidemiology and drug safety*. 2018;27(5):550-5.
26. Hayman J, Berecki-Gisolf J, Nielsen S, Lam T. Trends in Pharmaceutical Opioid-related Harm in Victoria, 2008/09 to 2017/18. Melbourne, Australia: Victorian Injury Surveillance Unit,, Victorian Injury Surveillance Unit; 2019.
27. Slade T, Johnston A, Teesson M, Whiteford H, Burgess P, Pirkis J, et al. The mental health of Australians 2. Report on the 2007 National Survey of Mental Health and Wellbeing. Canberra: Department of Health and Ageing; 2009.
28. Australian Bureau of Statistics. Measures of Socioeconomic Status. 2011.



Table 1. Summary of the search criteria

| Free-text search                                                                                                                                                                                                                                                                                                                                                                                                                                                                                                                                                                   | AND/OR | ICD10-AM code (where drug name does not appear in the text field)                                                                                                                                                                                                                                                                                                                                                                                                                           |
|------------------------------------------------------------------------------------------------------------------------------------------------------------------------------------------------------------------------------------------------------------------------------------------------------------------------------------------------------------------------------------------------------------------------------------------------------------------------------------------------------------------------------------------------------------------------------------|--------|---------------------------------------------------------------------------------------------------------------------------------------------------------------------------------------------------------------------------------------------------------------------------------------------------------------------------------------------------------------------------------------------------------------------------------------------------------------------------------------------|
| <p>[ All pharmaceutical opioid drug name including variations (e.g. “Tramadol/ tramal/ zydol”, “Morphine/ MS contin/ MS mono/ kapanol/ anamorph/ sevredol”, “Oxycodone/ oxycodone/ oxy/ oxycontin/ endone/ targin/ oxynorm/ proladone/ novacodone”)]</p> <p>AND</p> <p>[ Overdose/poisoning terms included in the text field (e.g. ‘overdose’ ‘od’ ‘poisoning’ ‘drug abuse’ ‘toxicity’ ‘poison’ ‘self harm’ ‘suicide’)]</p> <p>OR</p> <p>ICD10-AM codes for poisoning by narcotics and psychodysleptics’ appear in one of the three VEMD diagnosis codes T40.2, T40.3, T40.4 ]</p> |        | <p>The following T40 ‘poisoning by narcotics and psychodysleptics’ codes appear anywhere within the three VEMD diagnosis codes:</p> <ul style="list-style-type: none"> <li>• T40.2 - Other opioids e.g. codeine or morphine, also hydromorphone, oxycodone, opioid Not Elsewhere Classified (NEC), hydrocodone</li> <li>• T40.3 – Methadone</li> <li>• T40.4 - Other synthetic narcotics, including pethidine, Opiate NEC, buprenorphine, dextropropoxyphene, fentanyl, tramadol</li> </ul> |

Table 2. Variables and response options to be examined in association with pharmaceutical opioid-related emergency department presentations, by opioid-type.

| Category                                                     | Variable                           | Variable options                                                                                                                                                                                                                                                                                                                          |
|--------------------------------------------------------------|------------------------------------|-------------------------------------------------------------------------------------------------------------------------------------------------------------------------------------------------------------------------------------------------------------------------------------------------------------------------------------------|
| Patient demographics                                         | Age                                | ≥ 12years; extracted in five year blocks                                                                                                                                                                                                                                                                                                  |
|                                                              | Sex                                | Males, Females, Total (including other genders with cell sizes too small to be extracted separately)                                                                                                                                                                                                                                      |
|                                                              | Region                             | Metro, Regional/rural, Interstate/overseas, unknown                                                                                                                                                                                                                                                                                       |
|                                                              | Country of birth                   | Australia, overseas (presented as an English speaking country, or non-English speaking country if cell sizes allow). The 12 month substance use disorder prevalence is 6% for Australian born residents, 4.4% if the birthplace was another English-speaking country, and 1.6% for a non-English speaking country (27).                   |
|                                                              | Patient SEIFA                      | Socio-Economic Indexes for Areas (SEIFA) is a proxy measure for socio-economic status based on home postcode (28). Australians living in the lowest socio-economic areas have the highest burden of disease and highest rates of opioid prescriptions (2).                                                                                |
| Context of presentation (intent of use, indicator of misuse) | Human intent                       | <ul style="list-style-type: none"> <li>i. Unintentional</li> <li>ii. Intentional self-harm</li> <li>iii. Assault, maltreatment &amp; neglect</li> <li>iv. Other &amp; undetermined intent</li> </ul>                                                                                                                                      |
| Admission outcome (proxy of severity)                        |                                    | <ul style="list-style-type: none"> <li>i. Discharge to home/ returning to usual residence</li> <li>ii. Admission to ward/ procedure room - this campus (note, this is also a proxy for clinical severity)</li> <li>iii. Transfer to another hospital campus</li> <li>iv. Departure before treatment completed</li> </ul>                  |
| Triage severity of presentation (proxy of severity)          | Australasian Triage Scale Category | <p>Each of the five categories relates to treatment acuity and the maximum waiting time for medical assessment and treatment.</p> <ul style="list-style-type: none"> <li>i. ATS 1 (Immediate)</li> <li>ii. ATS 2 (10 minutes)</li> <li>iii. ATS 3 (30 minutes)</li> <li>iv. ATS 4 (60 minutes)</li> <li>v. ATS 5 (120 minutes)</li> </ul> |
